# Supplementary material
Source: PubMed Central journal article supplement (PMC6463698)
Supplement: supp_RA118.006029_141017_2_supp_286946_pmzbkt.pdf [file supp_RA118.006029_141017_2_supp_286946_pmzbkt.pdf]

# The regulatory protein GADD34 inhibits TRAIL-induced apoptosis via TRAF6/ERK-dependent stabilization of myeloid cell leukemia 1 in liver cancer cells

Peiying Song<sup>1</sup>, Songpeng Yang<sup>1</sup>, Hui Hua<sup>2</sup>, Hongying Zhang<sup>1</sup>, Qingbin Kong<sup>1</sup>, Jiao Wang<sup>3</sup>, Ting Luo<sup>4</sup>, Yangfu Jiang<sup>1\*</sup>

## Supplementary Information

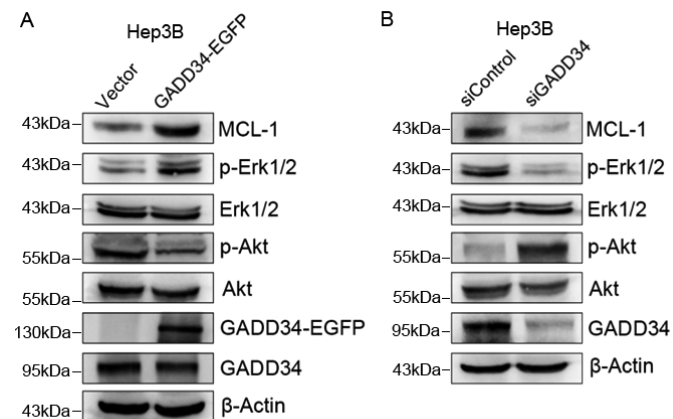

Fig. S1

**Supplementary Figure 1.** GADD34 up-regulates Erk phosphorylation and MCL-1 protein expression in Hep3B cells. (A) Hep3B cells were transfected with the EGFP-tagged GADD34 expression plasmid or EGFP vector, followed by western blot analysis of MCL-1, p-Erk1/2, p-Akt and GADD34 expression. (B) Hep3B cells were transfected with siControl or siGADD34, followed by western blot analysis of MCL-1, p-Erk1/2, p-Akt and GADD34 expression.

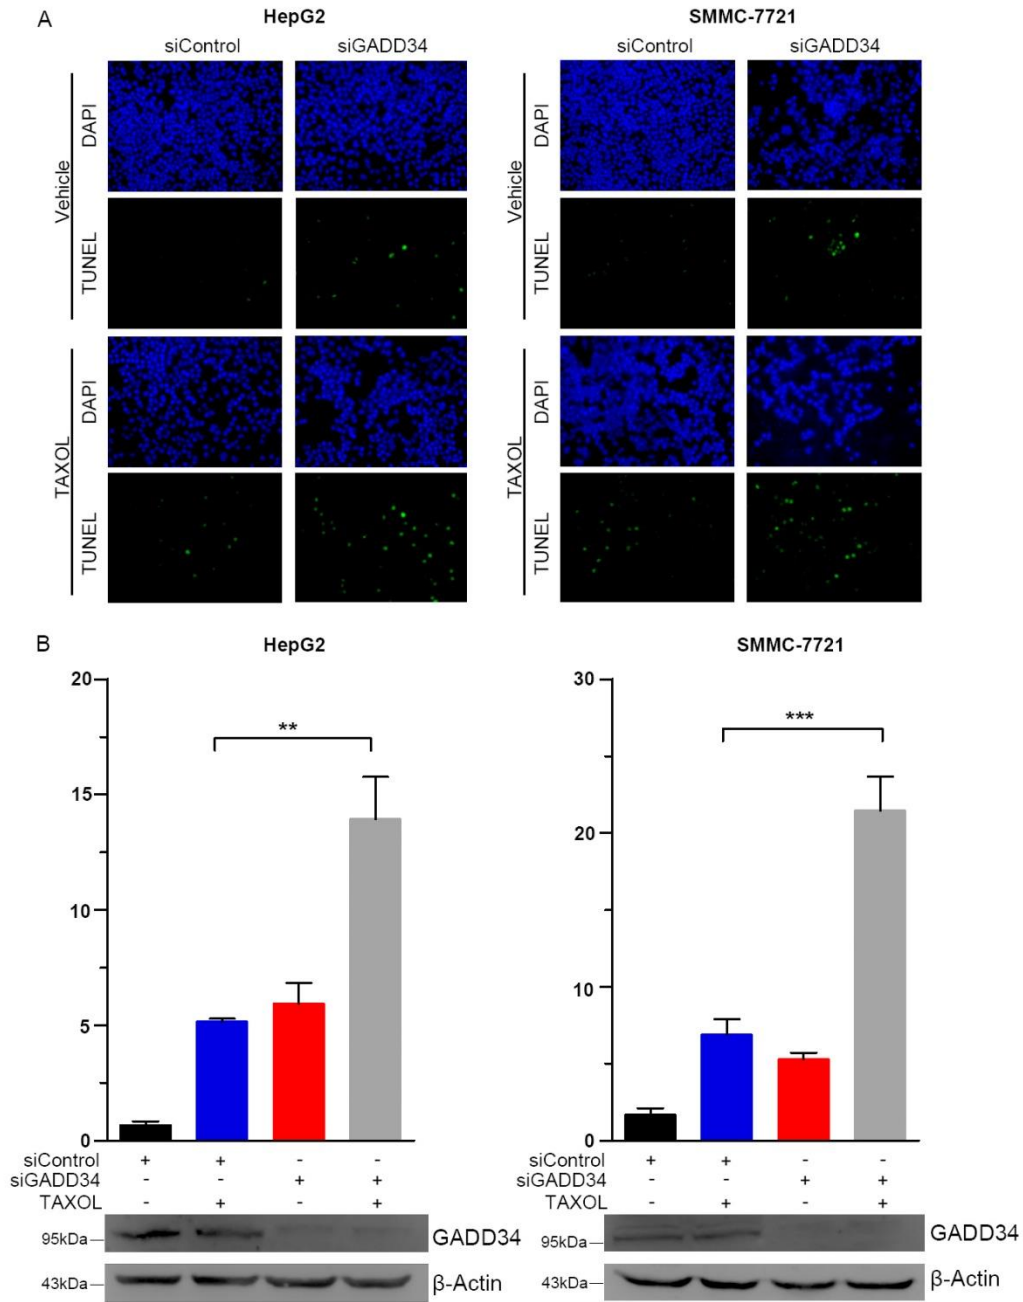

Fig. S2

**Supplementary Figure 2.** GADD34 knockdown promotes Taxol-induced apoptosis in HepG2 and SMMC-7721 cells. **(A)** HepG2 and SMMC-7721 cells were transfected with siControl or siGADD34, followed by treatment with or without 0.1  $\mu$ M of Taxol for 12 h. Cell apoptosis was detected by TUNEL assays. **(B)** The apoptotic rate was plotted. Values represent mean  $\pm$  SD (n = 3). \*\*,  $p < 0.01$ ; \*\*\*,  $p < 0.001$ . The efficiency of GADD34 knockdown was confirmed by western blotting.
